# Supplementary material for: A highly conserved pocket on PP2A‐B56 is required for hSgo1 binding and cohesion protection during mitosis
Source: PubMed Central journal article supplement (PMC8256288; doi:10.15252/embr.202052295), 2021-05-11
Supplement: EMBR-22-e52295-s007.pdf [file EMBR-22-e52295-s007.pdf]

## Expanded View Figures

### Figure EV1. Supporting information related to Fig 2.

- A YFP IP from cells stably expressing YFP-hSgo2 and transfected with FLAG-B56 $\alpha$  constructs. Representative blots are shown. FLAG-B56 $\alpha$  signals were normalized to hSgo2 and plotted. Error bars represent SD ( $n = 4$ ).
- B Validation of the B56 RNAi and rescue system. Endogenous B56 $\alpha$  was efficiently depleted 48 h after the RNAi treatment. The RNAi-resistant YFP-B56 $\alpha$  rescue constructs were expressed approximately at the endogenous level.
- C, D Localization of hSgo1(C) and hSgo2 (D) in cells depleted of B56 and expressing the indicated B56 $\alpha$  variants. Representative images from 3 independent experiments are shown. Scale bar, 5  $\mu$ m.
- E Experimental protocol of the live cell imaging shown in (F).
- F B56 RNAi and rescue with the indicated B56 $\alpha$  RNAi-resistant constructs were performed. Time (min) from nuclear envelop breakdown (NEBD) is indicated. Scale bar, 15  $\mu$ m.
- G The time from NEBD to anaphase was measured from 2 independent live cell imaging experiments. Each circle represents an individual cell. Blue circles indicate the cells that were still arrested at the end of filming, and red circles indicate the cells that died during mitosis. The median is indicated with the red horizontal bars. A Mann–Whitney test was used for statistical comparison.

Source data are available online for this figure.

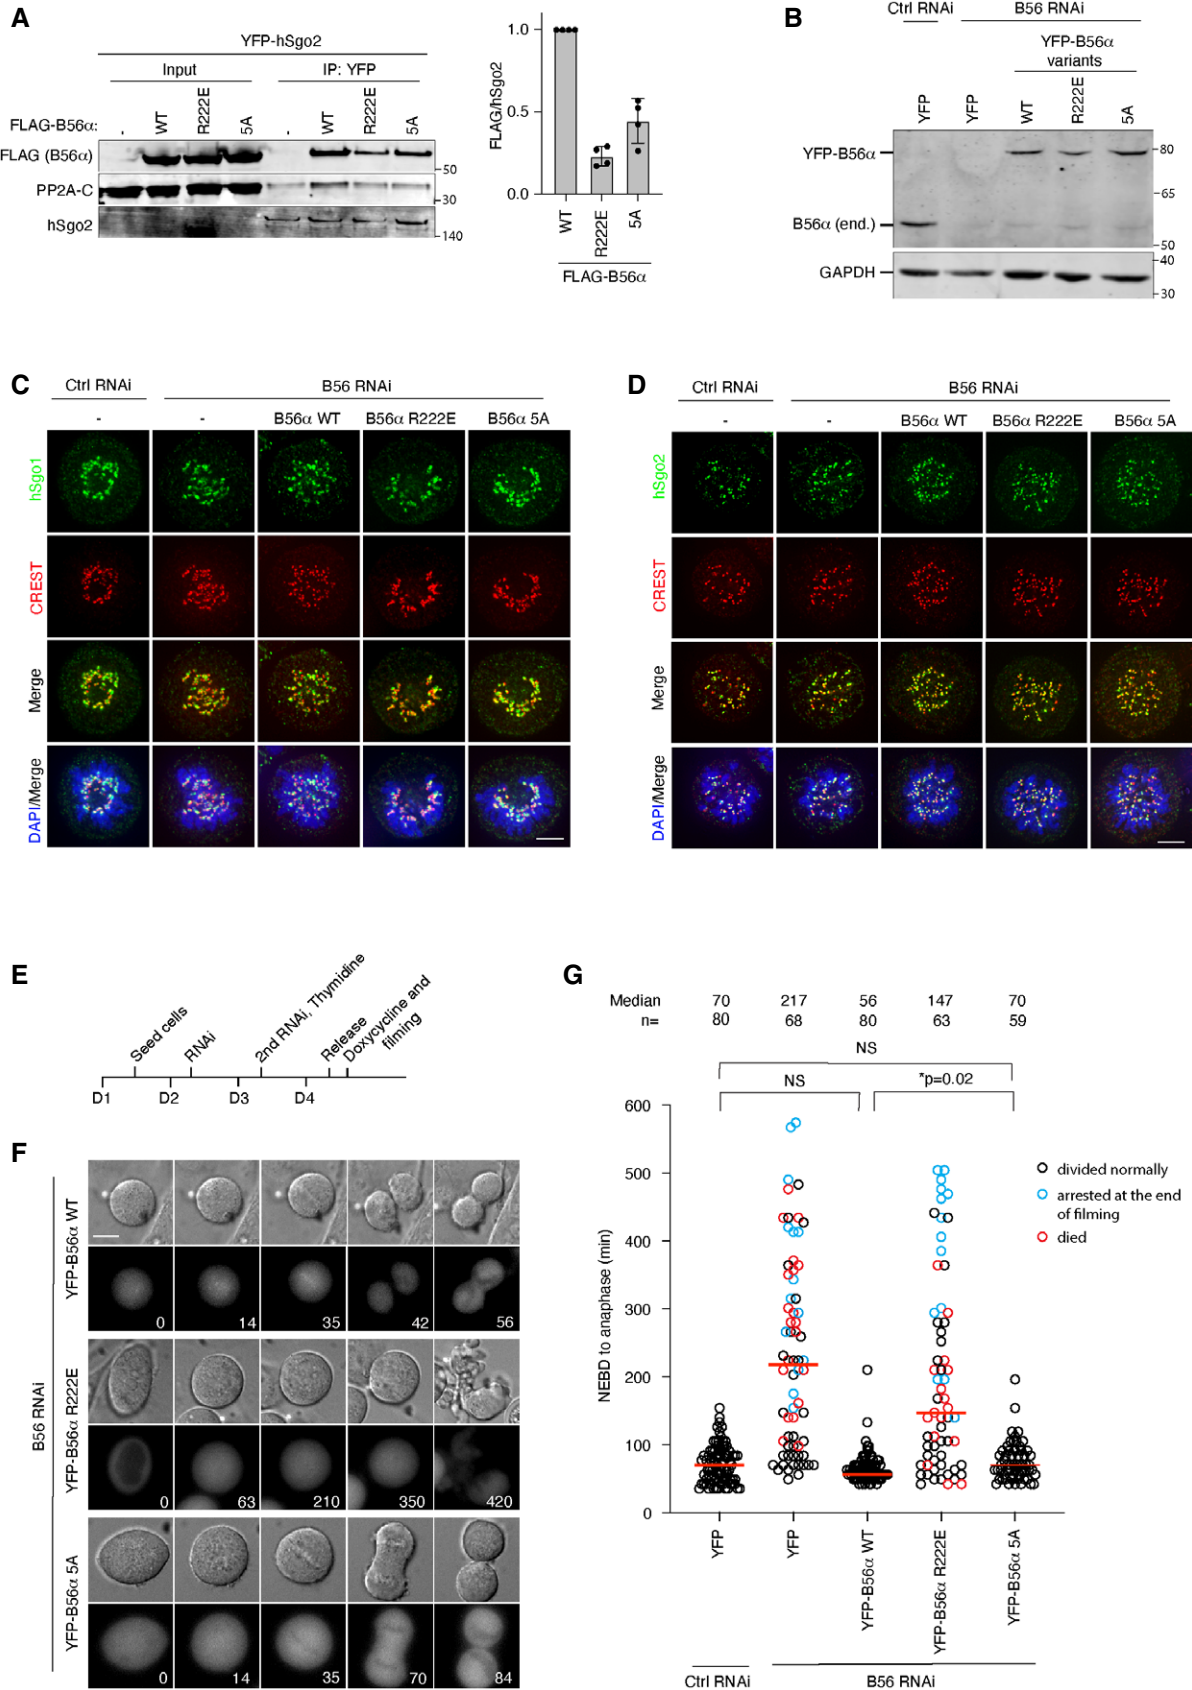

Figure EV1.

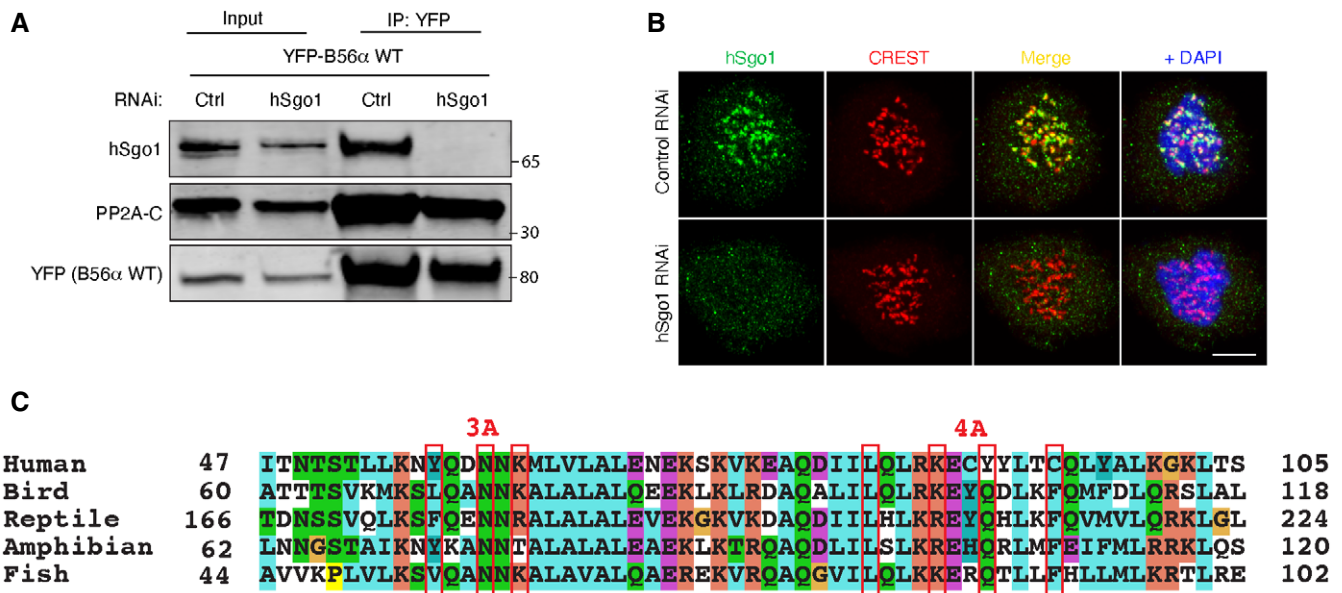

**Figure EV2. Validation of hSgo1 KD efficiency and the conservation of the hSgo1 coiled-coil region.**

- A Validation of the hSgo1 antibody and the hSgo1 RNAi by immunoblotting. While the hSgo1 antibody detects unspecific bands in the whole cell lysates (see input), it is specific for hSgo1 after B56 IP, as the treatment with hSgo1 RNAi completely abolishes hSgo1 signal after 48h.
- B Validation of the hSgo1 antibody and the hSgo1 RNAi by immunofluorescence. Representative immunofluorescent images are shown. Scale bar, 5  $\mu$ m.
- C The conservation of the hSgo1 coiled-coil region. The residues mutated in Sgo1 3A and 4A are indicated.

**Figure EV3. Supporting information related to Fig 3F and G.**

- A–C Mitotic U2OS LacO cells expressing hSgo1-LacI-GFP variants or LacI-GFP (control) were stained for CPC components, Aurora B (A) and Borealin (not shown). AuroraB (B) and Borealin (C) signal intensity was quantified, normalized to GFP, and plotted. Each circle represents an individual cell, and the mean is indicated. Representative of at least 3 experiments.
- D–H Mitotic U2OS LacO cells expressing hSgo1<sup>1–130</sup>-LacI-GFP variants or LacI-GFP (control) were stained for PP2A-C (D) or CPC components, Aurora B (E) and Borealin (not shown). PP2A-C (F), AuroraB (G), and Borealin (H) signal intensity were quantified, normalized to GFP, and plotted. Each circle represents an individual cell, and the mean is indicated. Representative of at least 3 experiments.

Data information: Scale bars (in A, D–E), 5  $\mu$ m.  
Source data are available online for this figure.

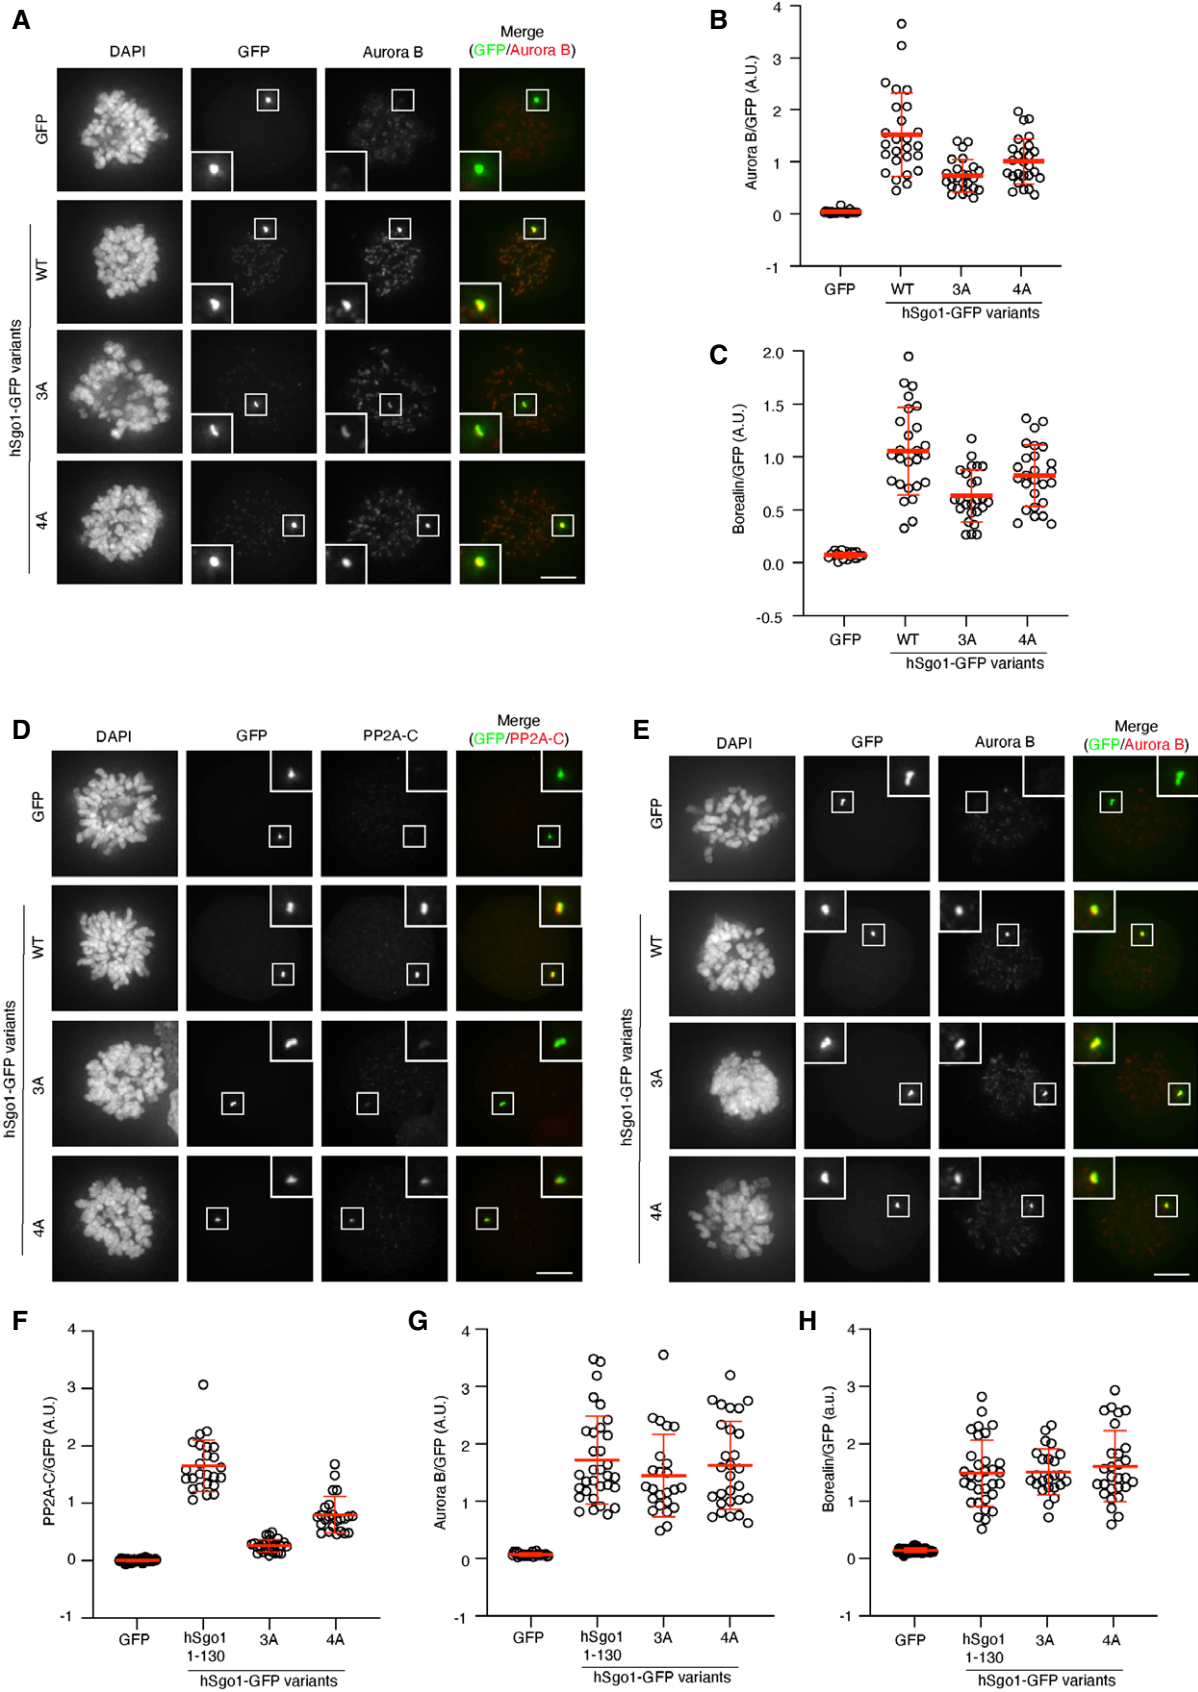

Figure EV3.

**Figure EV4. Validation of TurboID system and hSgo1KD and rescue in various conditions.**

- A Blot of stable, doxycycline-inducible TurboID-hSgo1 cells treated with doxycycline and/or biotin as indicated, and probed for hSgo1 or Streptavidin.
- B Volcano plot of TurboID-hSgo1 WT cells treated or untreated with biotin. B56 regulatory subunits (2A5A-E) and centromere as well as kinetochore proteins indicated (UniProt name indicated).
- C hSgo1KD and rescue with the indicated hSgo1 RNAi-resistant constructs  $\pm$  WAPL KD were performed. The time from nuclear envelop breakdown (NEBD) to anaphase was measured from the live cell imaging. Each circle represents an individual cell. Note that the hSgo1 + WAPL RNAi condition is incorporated into Fig 4G for clarity.
- D Experimental protocol of the live cell imaging with hSgo1 complementation with and without partial B56 depletion shown in (F).
- E WB showing the partial KD of all B56 isoforms.
- F hSgo1  $\pm$  partial B56 KD and rescue with the indicated hSgo1 RNAi-resistant constructs were performed. The time from nuclear envelop breakdown (NEBD) to anaphase was measured from the live cell imaging. Each circle represents an individual cell. Blue circles indicate the cells that were still arrested at the end of filming, and red circles indicate the cells that died. The median is indicated with the red horizontal bars. Representative of 2 independent experiments.

Source data are available online for this figure.

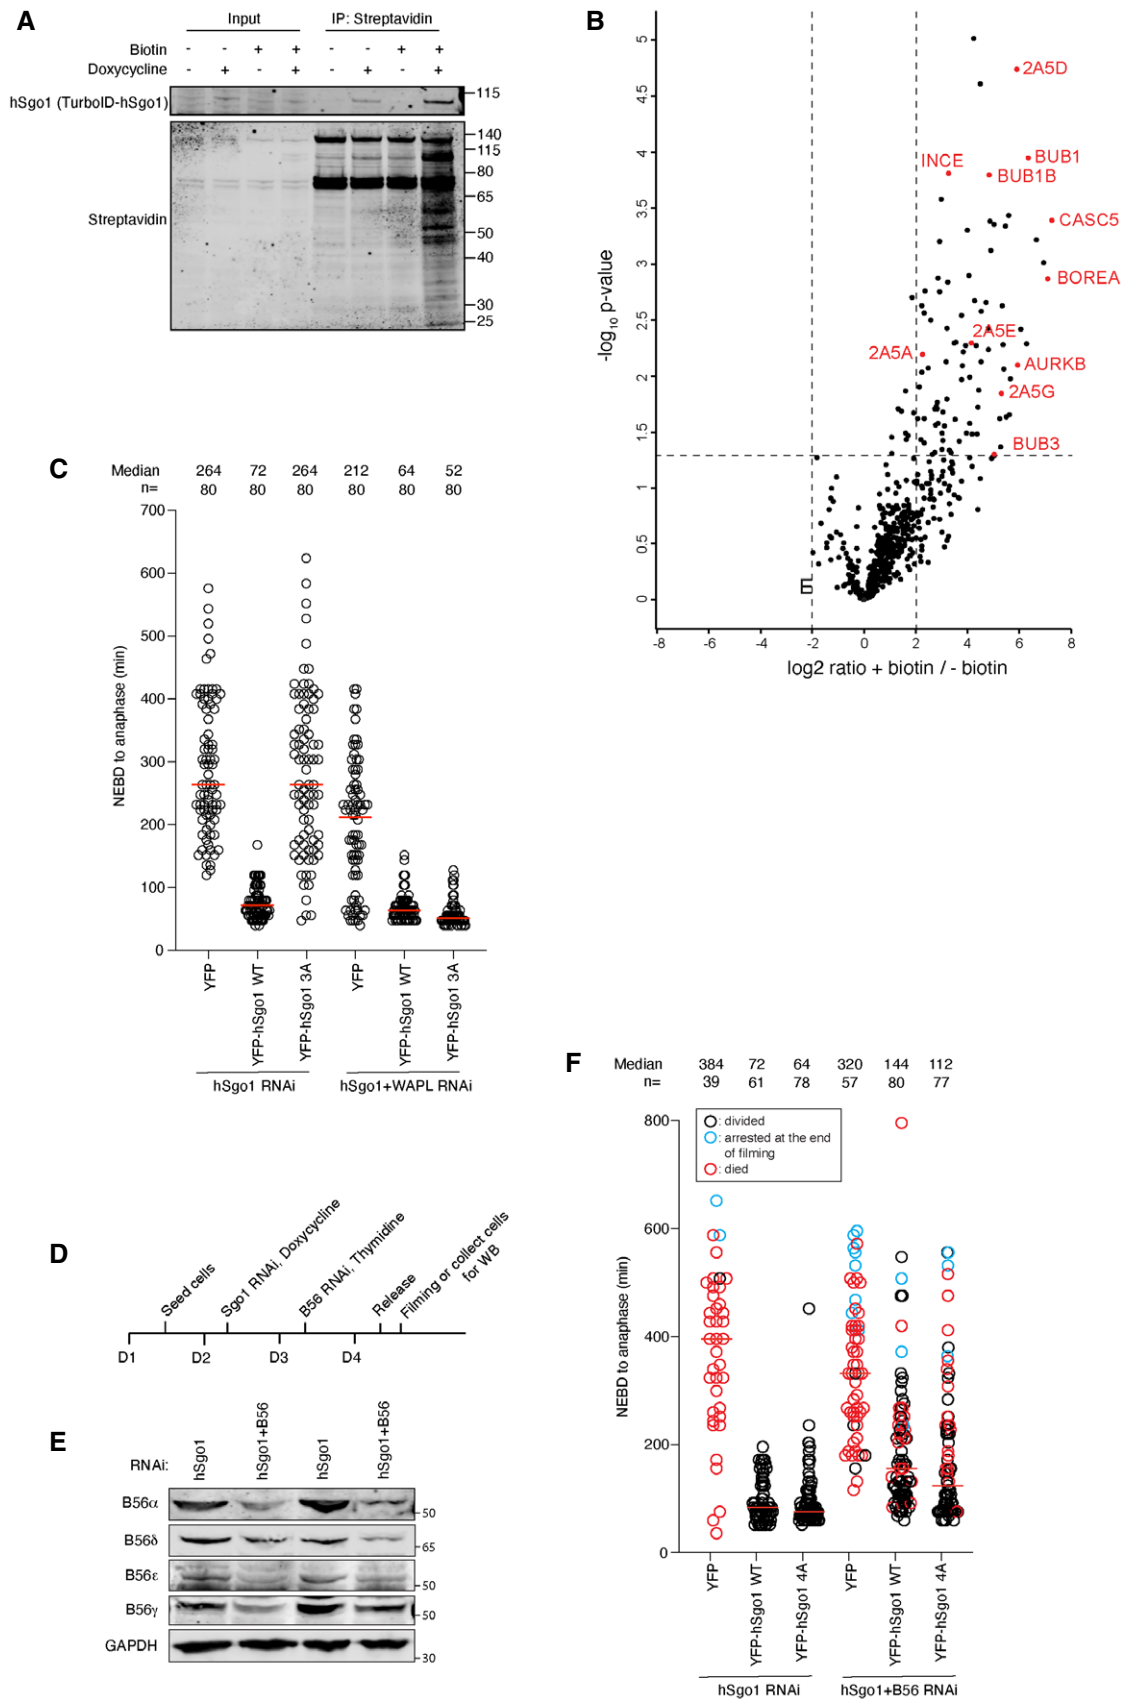

Figure EV4.
